# Supplementary material for: Comparison of NiOx thin film deposited by spin-coating or thermal evaporation for application as a hole transport layer of perovskite solar cells
Source: PubMed Central journal article supplement (PMC9058328; doi:10.1039/d0ra08776a), 2020-12-08
Supplement: RA-010-D0RA08776A-s001.pdf [file RA-010-D0RA08776A-s001.pdf]

## Supporting Information

# Comparison of NiO<sub>x</sub> thin film deposited by spin-coating or thermal evaporation for application as a hole transport layer of perovskite solar cells

Su-Kyung Kim<sup>a,b</sup>, Hae-Jun Seok<sup>a</sup>, Do-Hyeong Kim<sup>b</sup>, Dong-Hyeok Choi<sup>a,b</sup>, Seung-Ju Nam<sup>c</sup>, Suk-Cheol Kim<sup>\*b</sup>, and Han-Ki Kim<sup>\*a</sup>

<sup>a</sup>School of Advanced Materials Science and Engineering, Sungkyunkwan University, 2066, Seobu-ro, Jangan-gu, Suwon-si, Gyeonggi-do 16419, Republic of Korea.

<sup>b</sup>Korea Electric Power Research Institute, Daejeon, Republic of Korea.

<sup>c</sup>School of Mechanical Engineering, Chungnam National University, Daejeon, Republic of Korea.

<sup>a</sup> E-mail: [hankikim@skku.edu](mailto:hankikim@skku.edu) Fax: +82-31-201-2462; Tel: +82-31-205-2462

<sup>b</sup> E-mail: [ksc5351@kepeco.co.kr](mailto:ksc5351@kepeco.co.kr) Fax: +82-61-345-3047; Tel: +82-61-345-3010

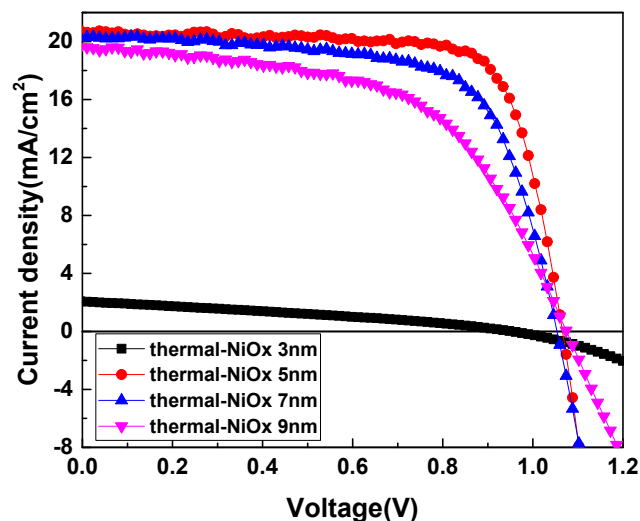

**Fig. S1** J-V curves of perovskite solar cells with thermal-NiO<sub>x</sub> according to the different thickness of thermal NiO<sub>x</sub>.

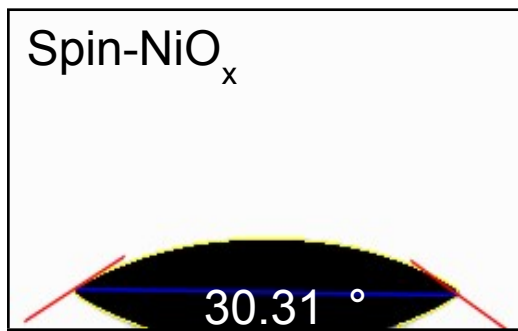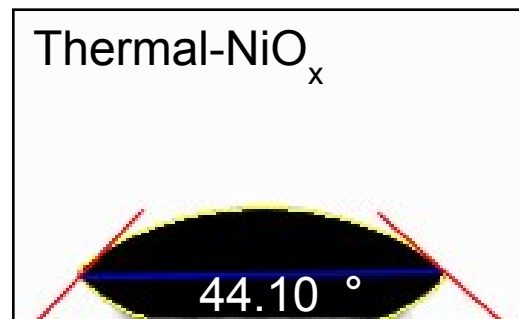

**Fig. S2** Contact angles of (a) the spin-NiO<sub>x</sub> and (b) the thermal-NiO<sub>x</sub> for perovskite precursor solution.

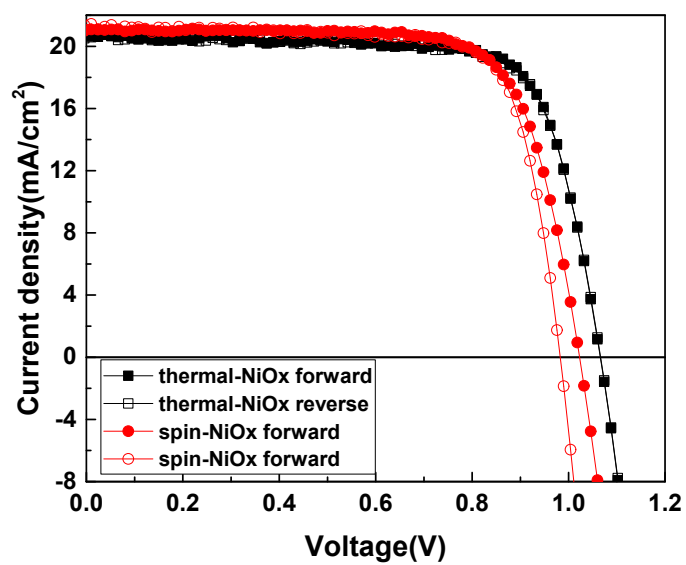

**Fig. S3** Forward and reverse J-V curves of the best performing PSCs with each of thermal-NiO<sub>x</sub> and spin-NiO<sub>x</sub>.

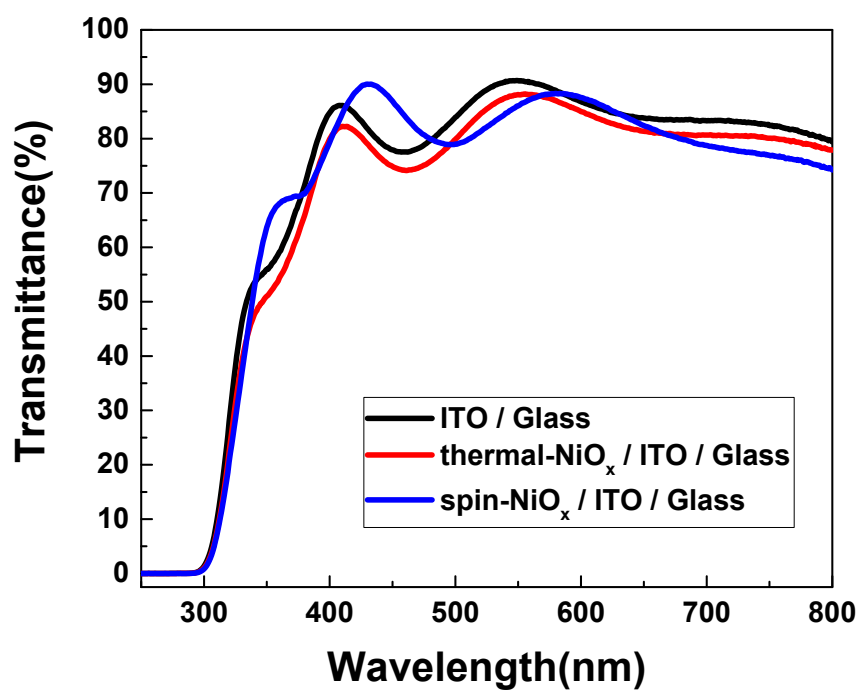

**Fig. S4** Optical transmission spectra of spin-NiO<sub>x</sub> or thermal-NiO<sub>x</sub> on ITO/Glass and ITO/Glass at 200~800nm wavelength.
